# Supplementary material for: Non-canonical Activation of Akt in Serum-Stimulated Fibroblasts, Revealed by Comparative Modeling of Pathway Dynamics
Source: PubMed Central journal article supplement (PMC4640559; doi:10.1371/journal.pcbi.1004505), 2015-11-10
Supplement: pcbi.1004505.s002.pdf [file pcbi.1004505.s002.pdf]

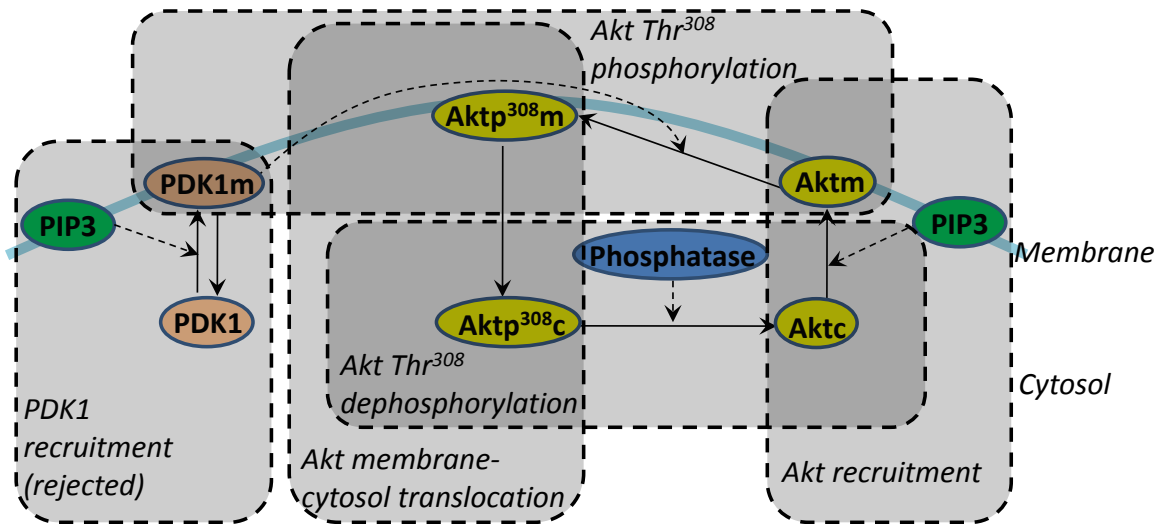

**Supplemental Figure S2. Top-down coverage of the pathway for investigating an unknown effect.** Five events (dashed boxes) in the canonical PIP3/Akt cascade were identified: PDK1 recruitment, Akt recruitment, Akt Thr<sup>308</sup> phosphorylation, Akt membrane-cytosol translocation and Akt Thr<sup>308</sup> dephosphorylation. One event (PDK1 recruitment) was rejected based on existing measurements showing that PDK1m mimics PIP3 dynamics.
