# Supplementary material for: Non-canonical Activation of Akt in Serum-Stimulated Fibroblasts, Revealed by Comparative Modeling of Pathway Dynamics
Source: PubMed Central journal article supplement (PMC4640559; doi:10.1371/journal.pcbi.1004505), 2015-11-10
Supplement: pcbi.1004505.s003.pdf [file pcbi.1004505.s003.pdf]

Supplemental Material for “Non-Canonical Activation of Akt in Serum-stimulated Fibroblasts, Revealed by Comparative Modeling of Pathway Dynamics”

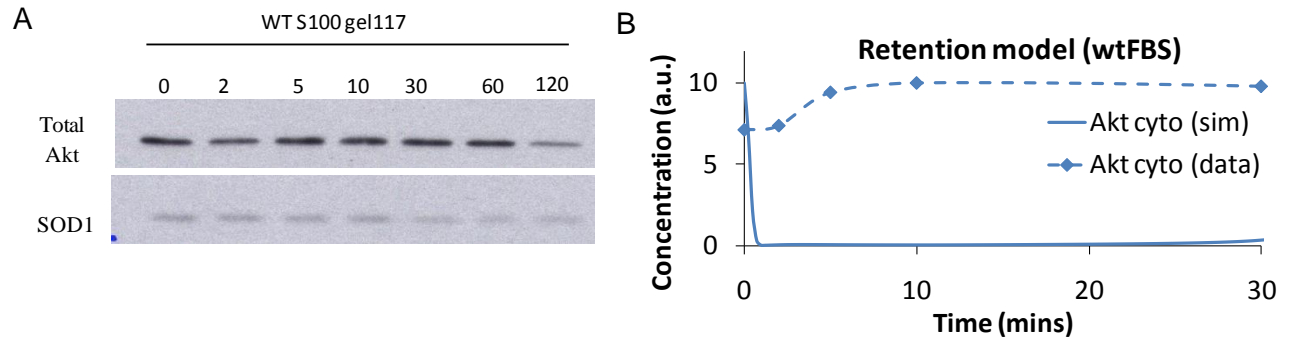

**Supplemental Figure S3.** (A) Time-series measurements of total Akt in the cytosol showed (B) qualitative disagreement with simulations of the retention model, suggesting that the retention model alone is insufficient to explain the data.
