# Supplementary material for: Non-canonical Activation of Akt in Serum-Stimulated Fibroblasts, Revealed by Comparative Modeling of Pathway Dynamics
Source: PubMed Central journal article supplement (PMC4640559; doi:10.1371/journal.pcbi.1004505), 2015-11-10
Supplement: pcbi.1004505.s006.pdf [file pcbi.1004505.s006.pdf]

**Supplemental Document S1. Ensemble analysis, scoring families of models for M1, M2 and M3.**

With the complexity and potential lack of well-defined minima in the alternative models, it was possible that multiple models within each alternative hypothesis could match the data equally well. Modeling studies such as by Chen *et al.* have considered multiple fits for evaluating model behavior rather than relying on a single best model (Chen, et al., 2009).

Following this approach, we proceeded to evaluate a broad spectrum of individuals. We generated an ensemble of parameterizations for each set of ODEs, which in practice means a family of similar instances for each alternative model. In each family, each of the 26 nominal parameters (*i.e.* best estimates from the optimal recruitment or retention model obtained by multiple-fitting described in the previous sections) was one-at-a-time doubled or halved, generating additional 52 slightly modified individuals surrounding the optimal model (*i.e.* model with nominal parameters).

In the figure below, the normalized peak features computed from these simulations (solid colored lines) were plotted in a radar chart against the peak features of the experimental dataset (thick dashed black lines), with the experimentally observed levels defined to be along the unit circle. See the table below of peak feature scores (“ratio with data”) for many instances of each model. We propose this type of multi-factor scoring and plot to display the trade-off in fitness between different parameterizations of the same ODEs, and we hope future work in pathway modeling will consider reuse of this visualization. The variation among members of each model family suggests the ruggedness of the peak score in the parameter space around the nominal parameters.

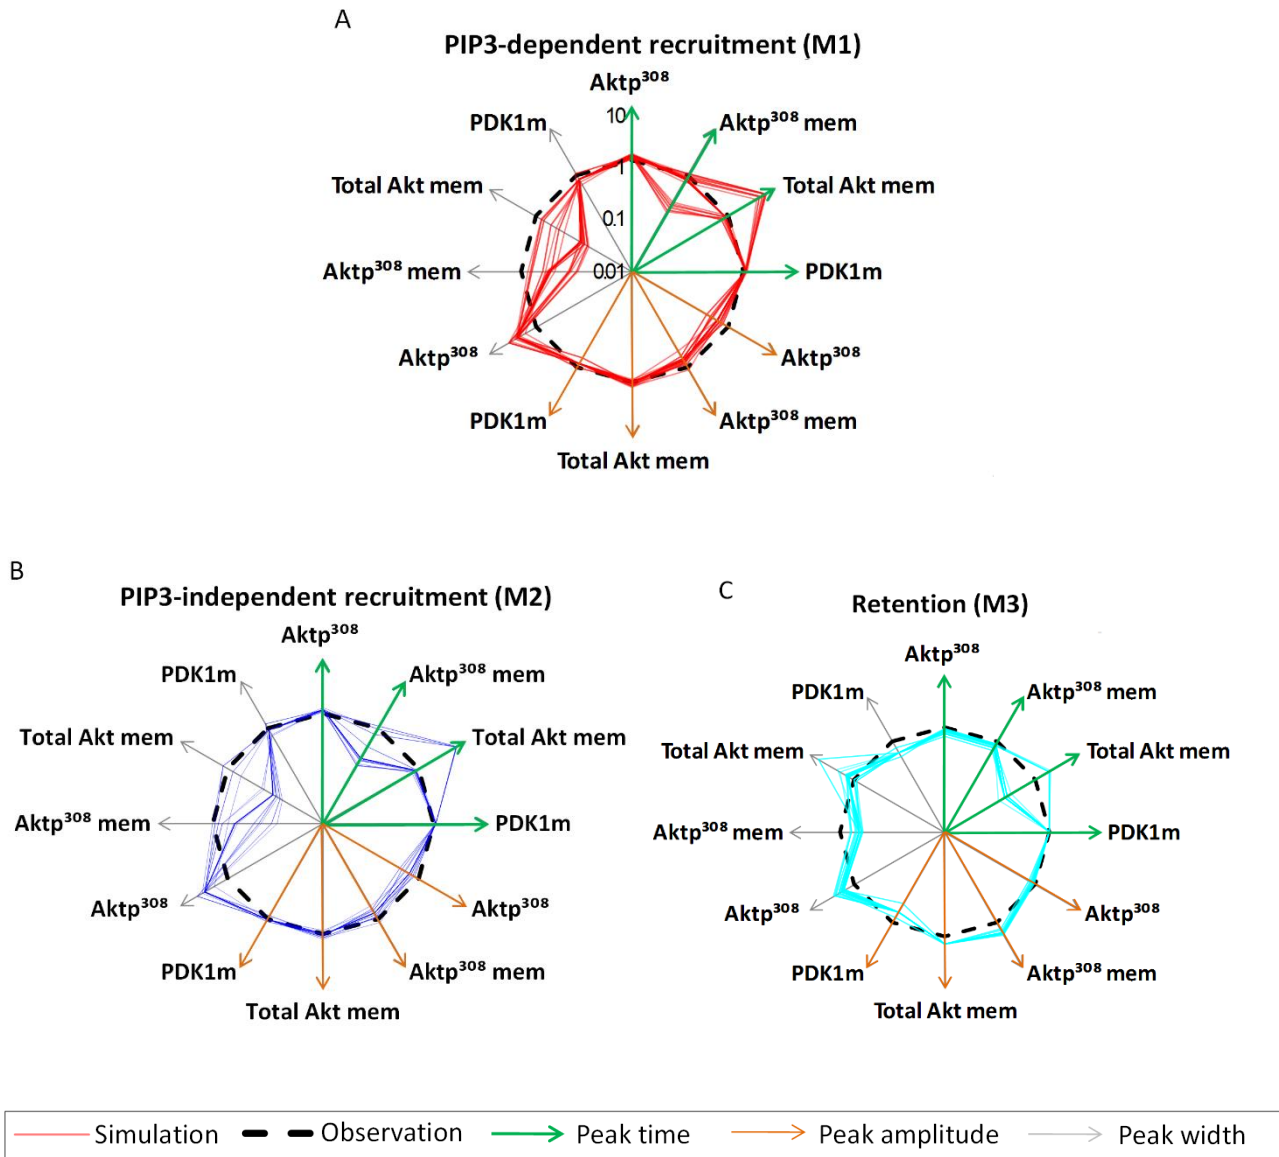

**Figure for Text S6.** (A) A diagram illustrating the definitions of the peak properties. Peak width is defined as the difference between the times when the level reaches 90% of the peak value in the time course. (B-D) A novel visualization scheme for displaying a multi-factorial comparison between an experimental dataset and a family of models. In these comparisons, 3 peak properties are used for comparing each of 4 measured species ( $3 \times 4 = 12$  axes). In each radar chart plot, four green axes indicate the peak times of the four measured species. Four brown axes indicate the peak amplitude and four gray axes indicate the peak width of the four measured species. The thickly dashed black circle indicates the peak vector of measurements, which is normalized to a unit vector. Multiple individuals of (B) PIP3-dependent recruitment, (C) retention, and (D) PIP3-independent model families (53 models per family) were compared with respect to the 12-dimensional peak vectors. Each model family contains the nominal parameters with one parameter doubled or halved. Peak time, peak amplitude and peak width were groups into arcs of the circle marked by colored arrows. Each arc contains four axes corresponding to the four measured time-series. All peak vectors from simulation (solid thin lines) were normalized with respect to the peak vector from measured data (dashed black circle) before plotting.

|                      |                         | Ratio with data (best=1) |            |            |            |            |            |            |            |            |            |
|----------------------|-------------------------|--------------------------|------------|------------|------------|------------|------------|------------|------------|------------|------------|
|                      |                         | M1-1                     | M1-2       | M1-3       | M1-4       | M1-5       | M1-6       | M1-7       | M1-8       | M1-9       | M1-10      |
| Peak time            | Aktp <sup>pos</sup>     | 1.25333333               | 1.29333333 | 1.21       | 1.31333333 | 1.26333333 | 1.15666667 | 1.17333333 | 1.27666667 | 1.25666667 | 1.25333333 |
|                      | Aktp <sup>pos</sup> mem | 0.86666667               | 0.89666667 | 0.84666667 | 1.05333333 | 0.96666667 | 0.18333333 | 1.05       | 0.25       | 0.86333333 | 0.86666667 |
|                      | Total Akt mem           | 0.9                      | 5.14       | 0.88       | 6.04       | 5.92       | 0.82       | 6.04       | 0.88       | 0.9        | 0.9        |
| Peak amplitude       | PDK1m                   | 1.15                     | 1.25       | 1.25       | 1.15       | 1.15       | 1.15       | 1.15       | 1.15       | 1.15       | 1.15       |
|                      | Aktp <sup>pos</sup>     | 0.61166                  | 0.47867    | 0.6807     | 0.47968    | 0.36361    | 0.74799    | 0.62878    | 0.8037     | 0.61025    | 0.61166    |
|                      | Aktp <sup>pos</sup> mem | 0.73222                  | 0.672      | 0.7602     | 0.68092    | 0.60012    | 0.87218    | 1.16506    | 0.67392    | 0.73924    | 0.73222    |
| Peak width           | Total Akt mem           | 1.0152                   | 1.1        | 1.00008571 | 0.93064286 | 1.1887     | 0.9557     | 1.21135714 | 1.00725714 | 1.01635714 | 1.0152     |
|                      | PDK1m                   | 0.8586                   | 0.6422     | 1.0124     | 0.8586375  | 0.8586375  | 0.8585125  | 0.8586125  | 0.8585125  | 0.8585375  | 0.8586     |
|                      | Aktp <sup>pos</sup>     | 2.47747748               | 2.46846847 | 2.5045045  | 1.73873874 | 2.4954955  | 2.57657658 | 2.74774775 | 3.75675676 | 2.46846847 | 2.47747748 |
| SSE (Peak time)      | Aktp <sup>pos</sup> mem | 0.31818182               | 0.41363636 | 0.28636364 | 0.36590909 | 0.68636364 | 0.1        | 0.75       | 0.13409091 | 0.31363636 | 0.31818182 |
|                      | Total Akt mem           | 0.11508951               | 0.4859335  | 0.09974425 | 0.37595908 | 0.75959079 | 0.08695652 | 0.80051151 | 0.10230179 | 0.11508951 | 0.11508951 |
|                      | PDK1m                   | 0.84615385               | 0.73076923 | 1.11538462 | 0.84615385 | 0.84615385 | 0.84615385 | 0.84615385 | 0.84615385 | 0.84615385 | 0.84615385 |
| SSE (Peak amplitude) |                         | 0.24273908               | 17.4845627 | 0.2023636  | 25.6976773 | 24.6350033 | 0.78535348 | 25.5644043 | 0.63793369 | 0.20308284 | 0.20108573 |
| SSE (Peak width)     |                         | 3.45455094               | 17.581469  | 0.23635653 | 25.7966449 | 24.7937962 | 0.13474699 | 25.5891491 | 0.18176186 | 0.25240084 | 0.25011408 |
| SSE Score (overall)  |                         | 3.81174558               | 20.6531836 | 3.9007061  | 27.2833629 | 27.3361826 | 5.00112782 | 28.8669423 | 10.0199148 | 3.79146548 | 3.81174558 |
| Minimum SSE Score:   |                         | 3.791465482              |            |            |            |            |            |            |            |            |            |

|                      |                         | M2-1        | M2-2       | M2-3       | M2-4       | M2-5       | M2-6       | M2-7       | M2-8       | M2-9       | M2-10      |
|----------------------|-------------------------|-------------|------------|------------|------------|------------|------------|------------|------------|------------|------------|
| Peak time            | Aktp <sup>pos</sup>     | 1.18        | 1.18       | 1.17333333 | 1.16333333 | 1.27333333 | 1.2        | 1.13       | 1.15       | 1.19       | 1.18       |
|                      | Aktp <sup>pos</sup> mem | 0.23333333  | 0.23333333 | 0.41       | 0.21666667 | 0.96333333 | 0.74333333 | 0.16666667 | 0.96333333 | 0.21       | 0.23666667 |
|                      | Total Akt mem           | 0.86        | 0.86       | 0.9        | 0.86       | 6.06       | 6.06       | 0.8        | 6.08       | 0.84       | 0.88       |
| Peak amplitude       | PDK1m                   | 1.1         | 1.1        | 1.15       | 1.1        | 1.1        | 1.1        | 1.1        | 1.1        | 1.1        | 1.1        |
|                      | Aktp <sup>pos</sup>     | 0.63809     | 0.63809    | 0.52795    | 0.69481    | 0.50637    | 0.40365    | 0.76043    | 0.64722    | 0.81786    | 0.6371     |
|                      | Aktp <sup>pos</sup> mem | 0.74094     | 0.74094    | 0.66214    | 0.80588    | 0.6627     | 0.60694    | 0.94682    | 1.16818    | 0.7274     | 0.74272    |
| Peak width           | Total Akt mem           | 1.03722857  | 1.03722857 | 1.05562857 | 1.02702857 | 0.86251429 | 1.11651429 | 0.97445714 | 1.17955714 | 1.02598571 | 1.03892857 |
|                      | PDK1m                   | 1.0193      | 1.0193     | 0.8514125  | 1.1219     | 1.019275   | 1.019225   | 1.0192375  | 1.0192875  | 1.0192875  | 1.0192375  |
|                      | Aktp <sup>pos</sup>     | 3           | 3          | 3.06306306 | 2.97297297 | 1.90090909 | 2.98198198 | 3.08108108 | 3.37837838 | 4.33333333 | 2.99090909 |
| SSE (Peak time)      | Aktp <sup>pos</sup> mem | 0.39772727  | 0.39772727 | 0.67727273 | 0.17727273 | 0.52954545 | 0.91590909 | 0.08636364 | 1.01590909 | 0.14772727 | 0.41590909 |
|                      | Total Akt mem           | 0.11253197  | 0.11253197 | 0.17391304 | 0.0971867  | 0.52685422 | 1.24808184 | 0.07928389 | 1.24296675 | 0.0971867  | 0.11508951 |
|                      | PDK1m                   | 0.92307692  | 0.92307692 | 0.73076923 | 1.23076923 | 0.92307692 | 0.92307692 | 0.92307692 | 0.92307692 | 0.92307692 | 0.92307692 |
| SSE (Peak amplitude) |                         | 0.64977778  | 0.64977778 | 0.41064444 | 0.66988889 | 25.6896556 | 25.7194778 | 0.76134444 | 25.8402444 | 0.6958     | 0.63947778 |
| SSE (Peak width)     |                         | 0.19984939  | 0.74835663 | 0.6034312  | 0.73635205 | 25.858615  | 26.0351111 | 0.80183823 | 25.9421982 | 0.69287498 | 0.73877419 |
| SSE Score (overall)  |                         | 5.1562491   | 0.22769093 | 0.36948058 | 0.16042351 | 25.9710419 | 26.1237295 | 0.1102219  | 25.9691382 | 0.14308574 | 0.22228941 |
| Minimum SSE Score:   |                         | 5.888084771 |            |            |            |            |            |            |            |            |            |

|                      |                         | M3-1        | M3-2       | M3-3       | M3-4       | M3-5       | M3-6       | M3-7       | M3-8       | M3-9       | M3-10      |
|----------------------|-------------------------|-------------|------------|------------|------------|------------|------------|------------|------------|------------|------------|
| Peak time            | Aktp <sup>pos</sup>     | 0.86333333  | 0.94       | 0.77666667 | 0.86333333 | 0.96333333 | 0.69       | 0.93333333 | 0.89       | 0.85333333 | 0.86333333 |
|                      | Aktp <sup>pos</sup> mem | 0.82333333  | 0.9        | 0.74       | 0.82666667 | 0.92333333 | 0.65666667 | 0.89666667 | 0.81666667 | 0.83       | 0.82333333 |
|                      | Total Akt mem           | 0.22        | 0.24       | 0.22       | 0.3        | 0.24       | 0.22       | 0.24       | 0.22       | 0.24       | 0.22       |
| Peak amplitude       | PDK1m                   | 1.05        | 1.05       | 1.05       | 1.05       | 1.05       | 1.05       | 1.05       | 1.05       | 1.05       | 1.05       |
|                      | Aktp <sup>pos</sup>     | 0.90142     | 0.79265    | 0.9492     | 0.90074    | 0.74127    | 0.9684     | 0.92867    | 0.90764    | 0.89822    | 0.90142    |
|                      | Aktp <sup>pos</sup> mem | 1.77394     | 1.55116    | 1.87502    | 1.77258    | 1.44668    | 1.91742    | 1.83808    | 1.7614     | 1.78084    | 1.77394    |
| Peak width           | Total Akt mem           | 1.42305714  | 1.42434286 | 1.42172857 | 1.42134286 | 1.42452857 | 1.42045714 | 1.42464286 | 1.42247143 | 1.42385714 | 1.42305714 |
|                      | PDK1m                   | 0.5944      | 0.3898125  | 0.804025   | 0.59445    | 0.5944375  | 0.5944     | 0.5944     | 0.5944125  | 0.5944125  | 0.5944     |
|                      | Aktp <sup>pos</sup>     | 1.97297297  | 1.74774775 | 2.27027027 | 1.96396396 | 1.71171171 | 2.51351351 | 2.79279279 | 2.26126126 | 1.89189189 | 1.97297297 |
| SSE (Peak time)      | Aktp <sup>pos</sup> mem | 0.43636364  | 0.39090909 | 0.48863636 | 0.43409091 | 0.38409091 | 0.52954545 | 0.61363636 | 0.425      | 0.44318182 | 0.43636364 |
|                      | Total Akt mem           | 1.38618926  | 1.50127877 | 1.31969309 | 1.36828645 | 1.54475703 | 1.2915601  | 2.03069054 | 0.88746803 | 2.39386189 | 1.38618926 |
|                      | PDK1m                   | 0.57692308  | 0.46153846 | 0.73076923 | 0.57692308 | 0.57692308 | 0.57692308 | 0.57692308 | 0.57692308 | 0.57692308 | 0.57692308 |
| SSE (Peak amplitude) |                         | 0.66078889  | 0.5937     | 0.72837778 | 0.54122222 | 0.58732222 | 0.82487778 | 0.59522222 | 0.65661111 | 1.13451111 | 0.66078889 |
| SSE (Peak width)     |                         | 0.95218985  | 0.63309402 | 0.68108064 | 0.53239699 | 0.65291899 | 0.72977634 | 0.59586575 | 0.65304148 | 1.12335917 | 0.65182913 |
| SSE Score (overall)  |                         | 1.59249858  | 0.92687137 | 1.37914064 | 1.0992324  | 0.84656424 | 1.45355802 | 1.28756606 | 1.19916033 | 1.70417027 | 1.21960114 |
| Minimum SSE Score:   |                         | 2.560123784 |            |            |            |            |            |            |            |            |            |

**Table for Text S6.** Scores of the peak features for 10 instances of each model (10 members at random from the ensemble) for M1-M3. The ratio with data indicates how closely each model resembles the peak characteristics of the experimental time-series, using 1 to denote a perfect match. The sum of squared error is evaluated using the peak characteristics within each model ensemble.

## References

Chen, W. W., et al. (2009) Input-output behavior of ErbB signaling pathways as revealed by a mass action model trained against dynamic data, *Mol Syst Biol*, 5, 239.
