# Supplementary material for: Non-canonical Activation of Akt in Serum-Stimulated Fibroblasts, Revealed by Comparative Modeling of Pathway Dynamics
Source: PLOS journal article supplement (doi:10.1371/journal.pcbi.1004505), 2015-11-10
Supplement: S8 (10.1371/journal.pcbi.1004505.s008) [file journal.pcbi.1004505.s008]

### **Supplemental Text S1. Construction of the alternative models M1-M5.**

The recruitment effect (in M1-M2) was modeled as an unknown input, which acts as a time-variant multiplier to PIP3's recruitment reaction of Akt to the membrane (#1 of Table 1). In the retention model (M3), the membrane-bound phosphorylated Akt (Aktp<sup>308</sup>m) is hypothesized to have two “states”: Aktp<sup>308</sup>mf (the normal membrane-localized state of Aktp<sup>308</sup>) and Aktp<sup>308</sup>mt (the state that cannot dissociate from the membrane). The “retention effect” was implemented using an artificial species called “retention” that converts Aktp<sup>308</sup>mf to Aktp<sup>308</sup>mt. To balance this effect, we add a spontaneous reversal, in which the membrane-trapped state (Aktp<sup>308</sup>mt) reverts to the normal membrane-localized form (Aktp<sup>308</sup>mf) and restores the ability of Aktp<sup>308</sup> to dissociate from the membrane. In M4, we encode the general concept of a “dephosphorylation effect” using an artificial “dephosphorylation” species that drives the conversion of the normal phosphatase (Phosphatase) into an inaccessible state (InaccPhosphatase), and using a spontaneous reverse reaction for conversion of the inactive phosphatase into its normal functional phosphatase. Finally in M5 we introduced a hypothesized “Phosphorylation” species that acts in conjunction with PIP3:PDK1m to phosphorylate Akt at the membrane.
